## Correction: Prognostic and diagnostic significance of lncRNAs expression in cervical cancer: a systematic review and meta-analysis

Shuqi Chi<sup>1,\*</sup>, Lina Shen<sup>1,\*</sup>, Teng Hua<sup>1,\*</sup>, Shuangge Liu<sup>1</sup>, Guobing Zhuang<sup>1</sup>, Xiaoxiao Wang<sup>1</sup>, Xing Zhou<sup>1</sup>, Guozhen Wang<sup>1</sup> and Hongbo Wang<sup>1</sup>

<sup>1</sup> Department of Obstetrics and Gynecology, Union Hospital, Tongji Medical College, Huazhong University of Science and Technology, Wuhan 430022, China

\* These authors have contributed equally to this work

**Published:** November 21, 2017

Copyright: Chi et al. This is an open-access article distributed under the terms of the Creative Commons Attribution License 3.0 (CC BY 3.0), which permits unrestricted use, distribution, and reproduction in any medium, provided the original author and source are credited.

**This article has been corrected:** the affiliation was updated and is as follows:

<sup>1</sup> Department of Obstetrics and Gynecology, Union Hospital, Tongji Medical College, Huazhong University of Science and Technology, Wuhan 430022, China

Original article: Oncotarget. 2017; 8:79061-79072. <https://doi.org/10.18632/oncotarget.18323>
